# Supplementary material for: Changing Meal Sequence Affects Glucose Excursions in Gestational Diabetes Mellitus
Source: Hindawi journal article supplement (doi:10.1155/2022/7083106), 2022-07-21
Supplement: f1 [file 7083106.f1.pdf]

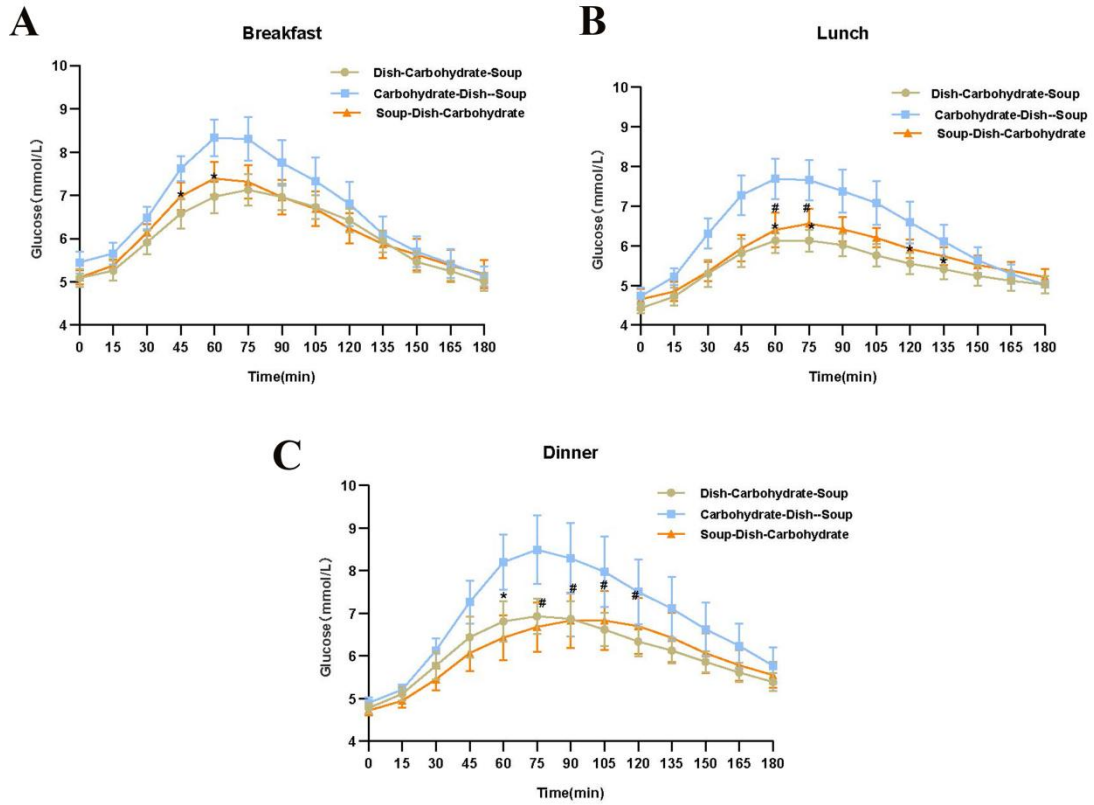

**Supplement figure 1:** The postprandial glucose levels at 15 min intervals from 0-180 mins after each meal.\*  $P < 0.05$  compared with B and A sequence. #  $P < 0.05$  compared with B and C sequence.
