# Supplementary material for: Changing Meal Sequence Affects Glucose Excursions in Gestational Diabetes Mellitus
Source: Hindawi journal article supplement (doi:10.1155/2022/7083106), 2022-07-21
Supplement: f2 [file 7083106.f2.pdf]

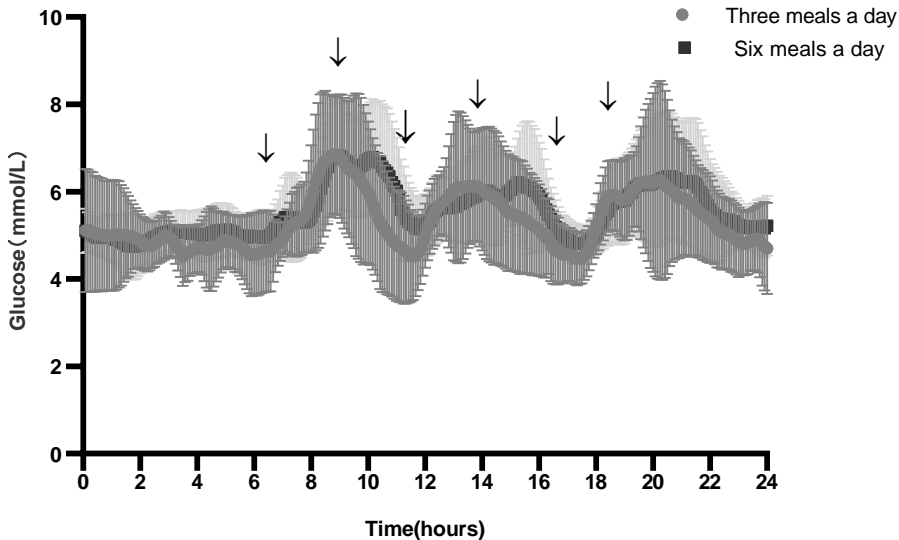

Supplementary Figure 2: Mean ( $\pm$ SEM) diurnal glucose levels following three meals a day (gray dots) and six meals a day (black dots). Average mealtimes are represented by the black arrows.
